# Supplementary figures and images for: Identification of Nitrogen Fixation Genes in Lactococcus Isolated from Maize Using Population Genomics and Machine Learning
Source: MDPI journal article supplement (doi:10.3390/microorganisms8122043), 2020-12-20

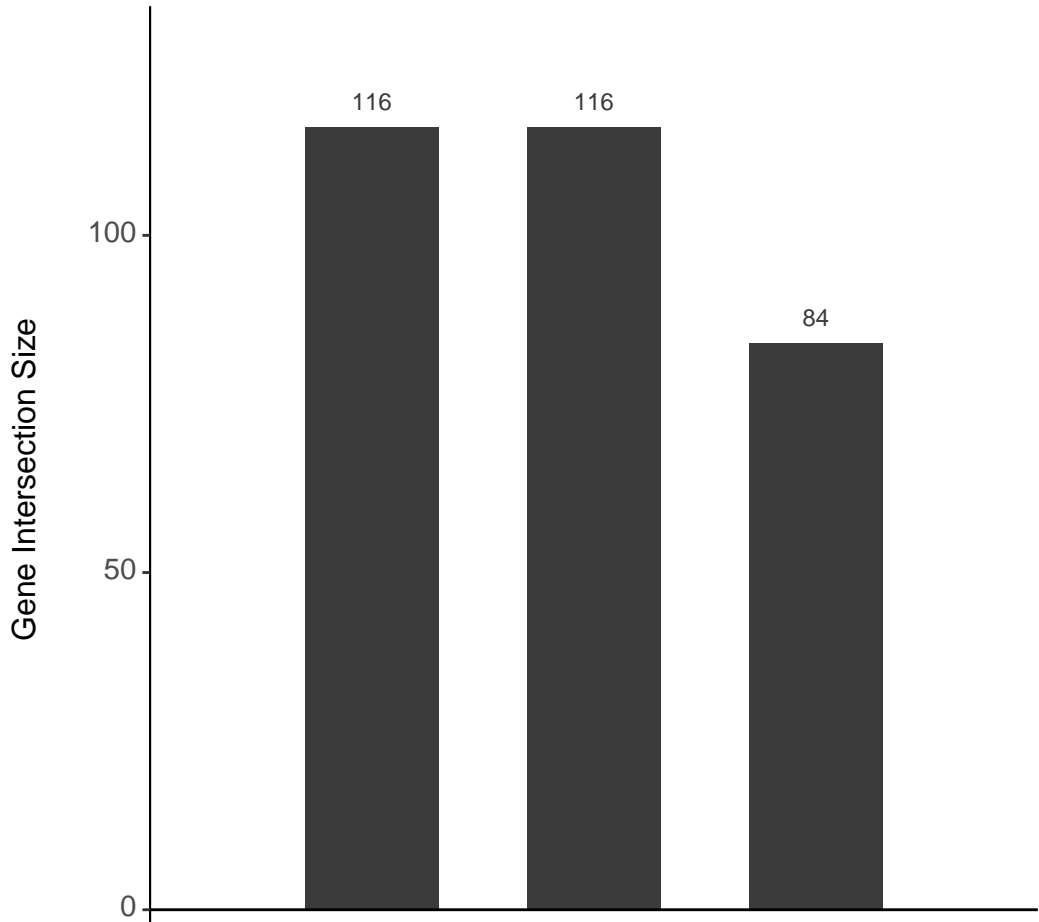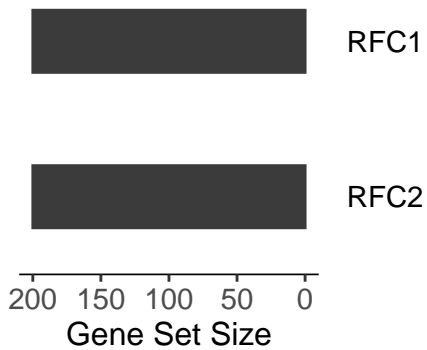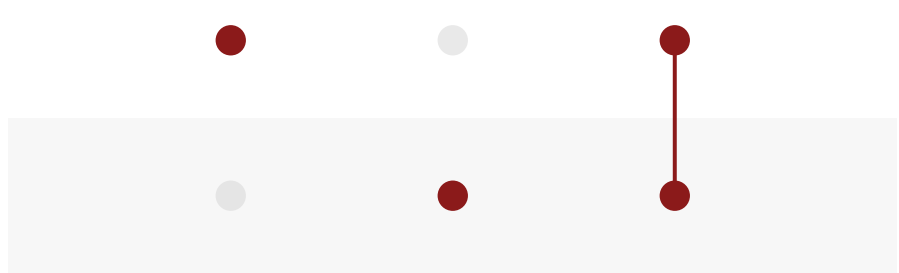

Supplement: s1 [file s1]
